# Supplementary material for: Medication following bariatric surgery for type 2 diabetes mellitus (BY-PLUS) study: rationale and design of a randomised controlled study
Source: HighWire-hosted journal article supplement (doi:10.1136/bmjopen-2021-054313), 2022-07-01
Supplement: bmjopen-2021-054313supp001_data_supplement.pdf [file bmjopen-2021-054313supp001_data_supplement.pdf]

## BMJ Open Supporting Information

### Ethics and Dissemination

London Fulham Research Ethics Committee- Rev Nigel Griffin (chairperson) , Ms Diana Barham, Mr Keith Berelowitz, Ms Mabel Cortes, Mr Frank Cross, Professor John Dark, Dr Jan Downer, Dr Peter Richard Hayes, Miss Kate Hazelhurst, Mr Greg Kyle-Langley, Mrs Deborah Morgan, Miss Hayley Noble, Dr Phillipa Jane Rollins, Mr David Parr, Ms Catriona Stirling, Ms Gemma Warren

St Vincent's University Hospital Ethics Committee- Professor Ronan Killeen, Professor Alastair Nichol, Dr Marcus Butler, Dr Eleanor Dunican, Professor Cormac McCarthy, Professor Aurelie Fabre, Ms Jackie McCavana, Professor Chris McGuigan, Dr Susan Brannick, Dr David Murphy, Dr Keith Smart, Mr S Guan Khoo, Ms Martina Fitzpatrick, Mr Paul Tighe, Dr Marie Galligan, Professor Walter Cullen. Lay Committee- Mr Mark Daly, Mr Dermot Cullinan, Mr Sean Gibney, Mr Donal Kelly, Mr Peter Brady
